# Supplementary material for: Development of a novel cellulose solvent based on pyrrolidinium hydroxide and reliable solubility analysis
Source: Royal Society of Chemistry journal article supplement (doi:10.1039/d0ra01486a), 2020-01-01
Supplement: d0ra01486a1.pdf [file d0ra01486a1.pdf]

## Supplementary information

### Development of a novel cellulose solvent based on pyrrolidinium hydroxide and reliable solubility analysis

Received 00th January 20xx,  
Accepted 00th January 20xx

Elisabeth Rada Desideria Seiler <sup>a</sup>, Yuko Takeoka <sup>a</sup>, Masahiro Rikukawa <sup>a</sup> and Masahiro Yoshizawa-Fujita

DOI: 10.1039/x0xx00000x

#### Characterization of [C<sub>4</sub>mpyr][OH]

<sup>1</sup>H-NMR (400 MHz, DMSO-*d*<sub>6</sub>)  $\delta$  = 3.39-3.52 (m, 4H, c), 3.32-3.28 (m, 2H, e), 2.98 (s, 3H, a), 2.07 (s, 4H, b), 1.63-1.71 (m, 2H, d), 1.31 (td, J = 14.8, 7.5 Hz, 2H, f), 0.90-0.94 (t, J = 7.4 Hz, 3H, g).

MS (EI, 70 eV): *m/z* (%) = 446.3, 305.1, 152.0, 142.1 (M<sup>+</sup>).

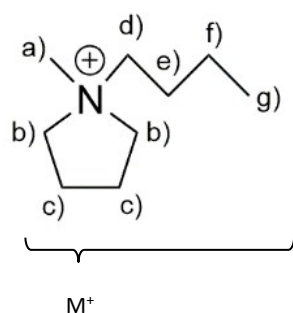

**Table S1** Solubility of microcrystalline cellulose in aqueous [C<sub>4</sub>mpyr][OH] at 25 °C.

| Water / wt% | Water / IL (mole ratio) | Maximal solubility |                 | Insolubility    |                 | Turbidity increase / NTU |
|-------------|-------------------------|--------------------|-----------------|-----------------|-----------------|--------------------------|
|             |                         | Cellulose / wt%    | Turbidity / NTU | Cellulose / wt% | Turbidity / NTU |                          |
| 45.15       | 7.26                    | -                  | -               | 0.23            | 205.40          | 205.40                   |
| 49.88       | 8.78                    | 19.98              | 7.99            | 21.04           | 42.30           | 34.31                    |
| 55.42       | 10.97                   | 13.93              | 15.93           | 15.06           | 46.20           | 30.27                    |
| 60.16       | 13.32                   | 10.05              | 25.28           | 11.09           | 56.43           | 31.15                    |
| 65.51       | 16.76                   | 6.97               | 16.01           | 8.07            | 33.13           | 17.12                    |
| 70.61       | 21.20                   | 6.00               | 15.64           | 7.00            | 51.10           | 35.46                    |
| 74.40       | 25.64                   | 0.22               | 21.83           | 0.85            | 91.16           | 69.33                    |
| 80.95       | 37.50                   | -                  | -               | 0.24            | 432.30          | 432.30                   |

Maximal solubility = no crystals seen under the microscope

Insolubility = crystals were visible under the microscope

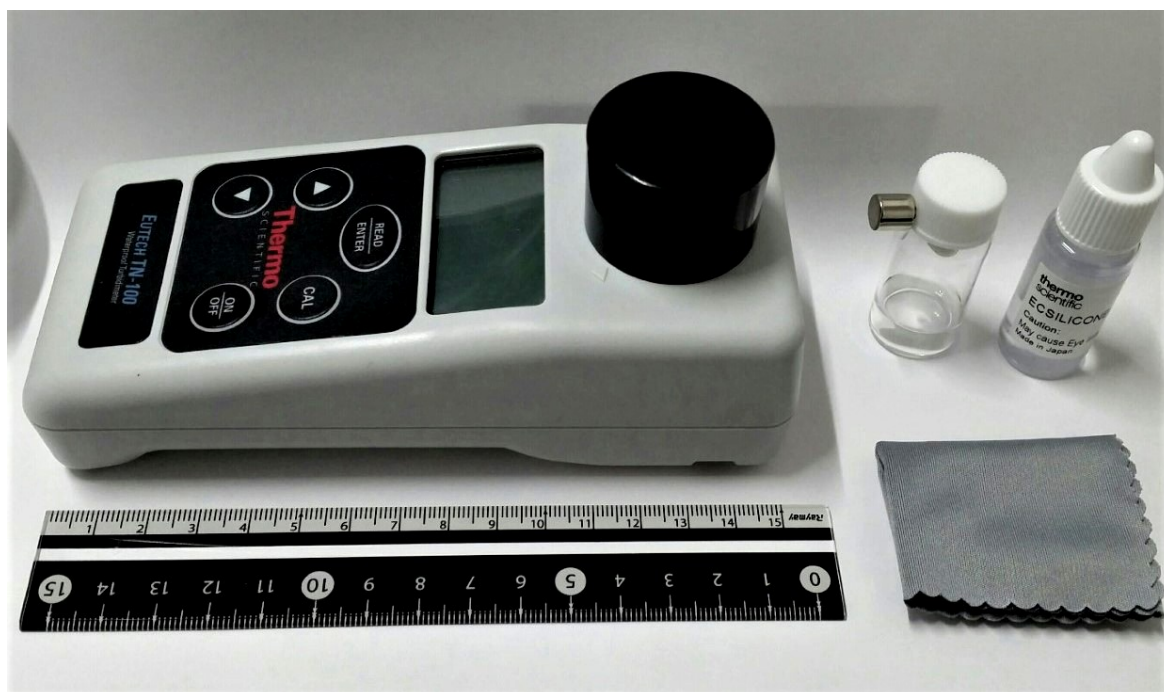

**Figure S1** Photograph of a turbidity meter with glass vial (the stirrer bar is fixed with a magnet), silicone oil and a cloth.

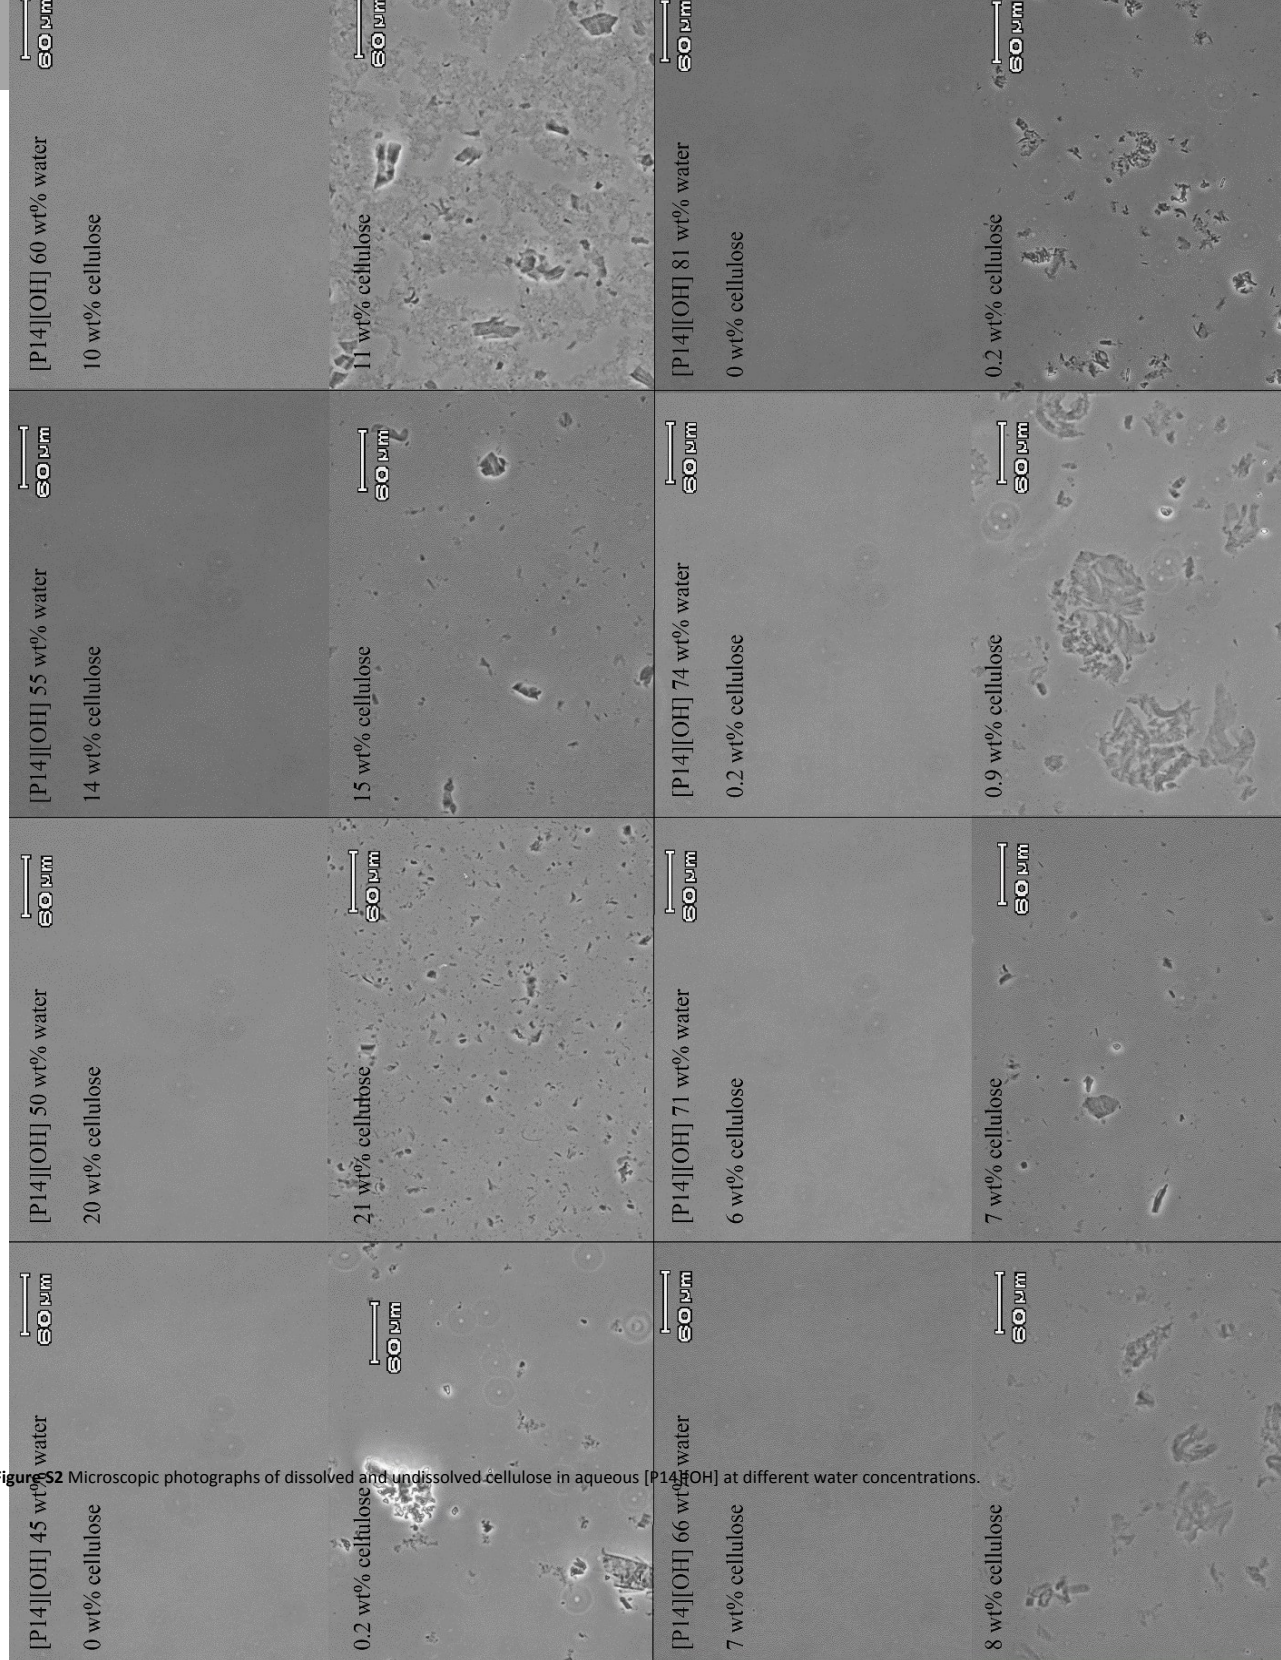

Figure S2 Microscopic photographs of dissolved and undissolved cellulose in aqueous [P14][OH] at different water concentrations.
